# Supplementary material
Source: MDPI journal article supplement (https://www.mdpi.com/2311-7524/8/5/433)
Supplement: s1 [file s1 › horticulturae-1696965-supplementary.pdf]

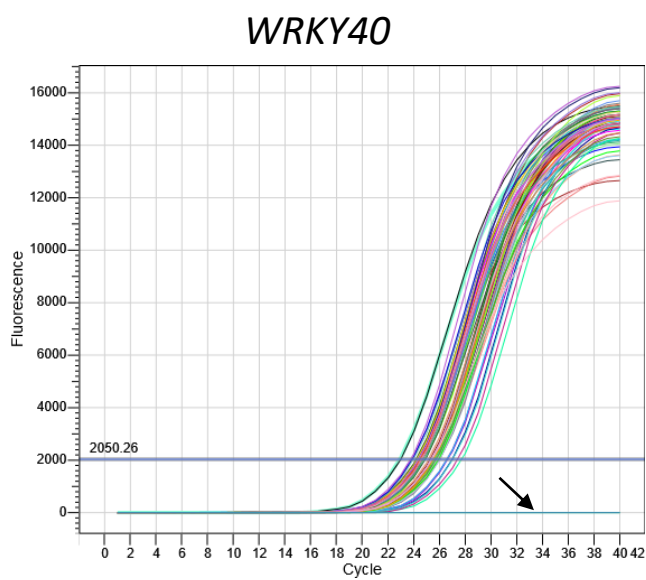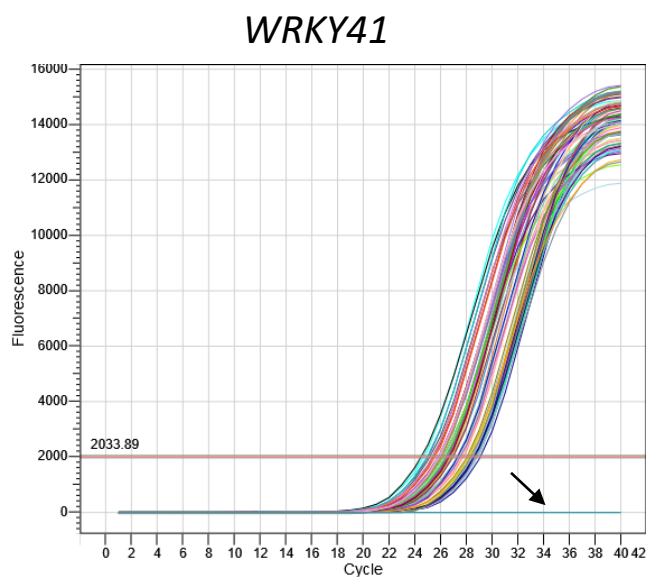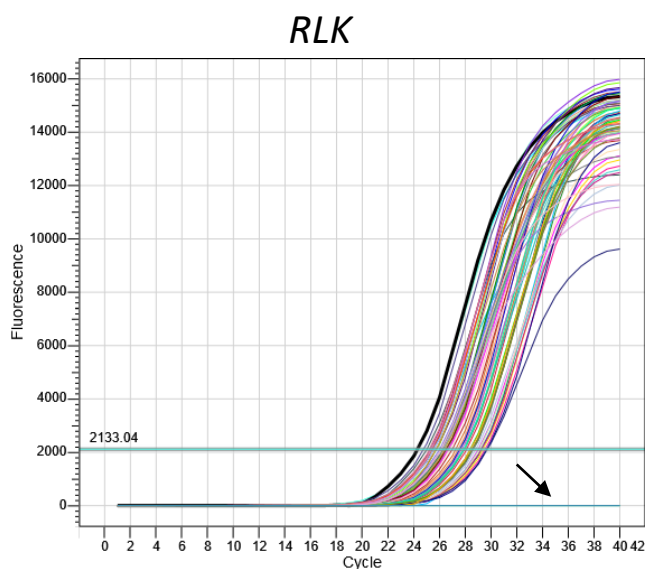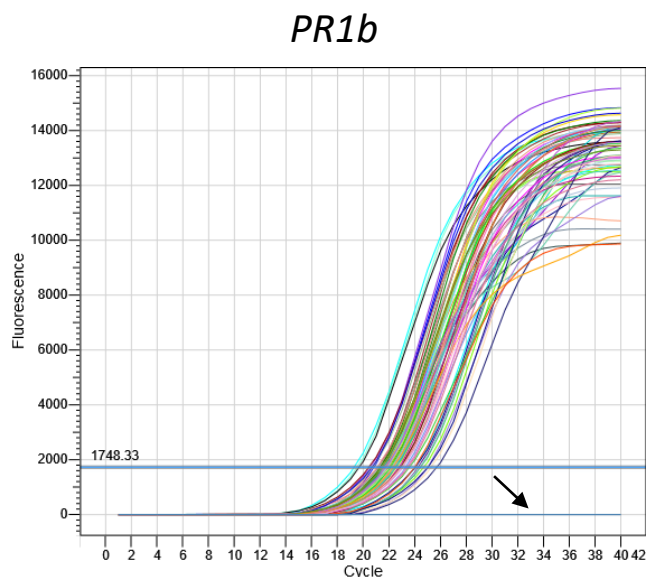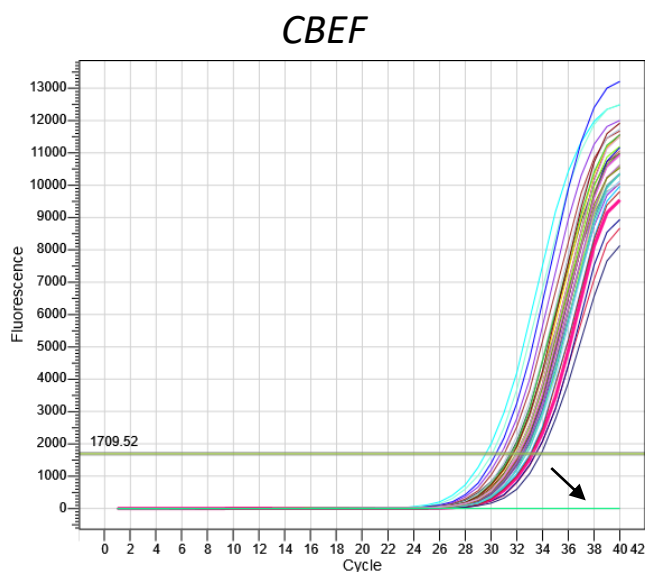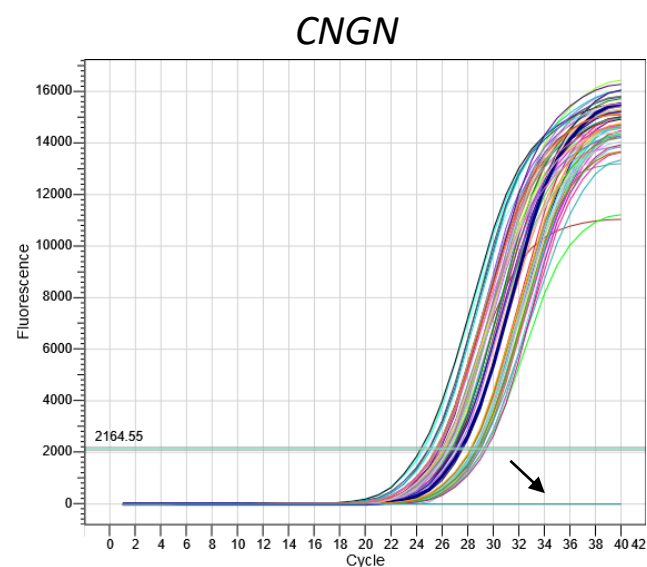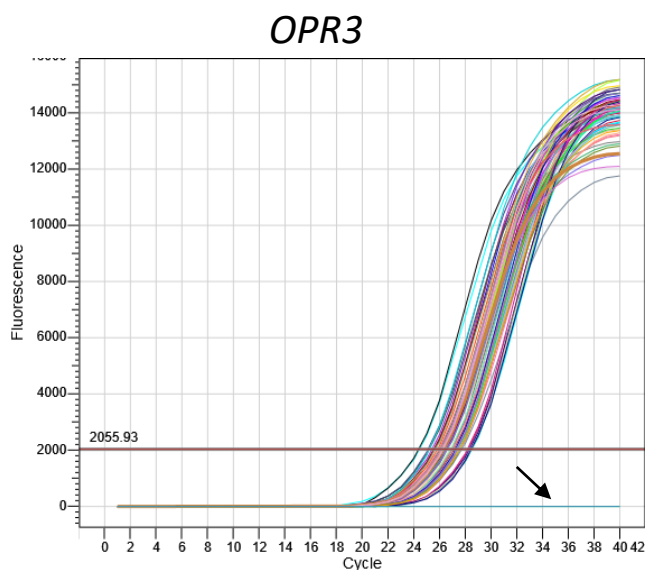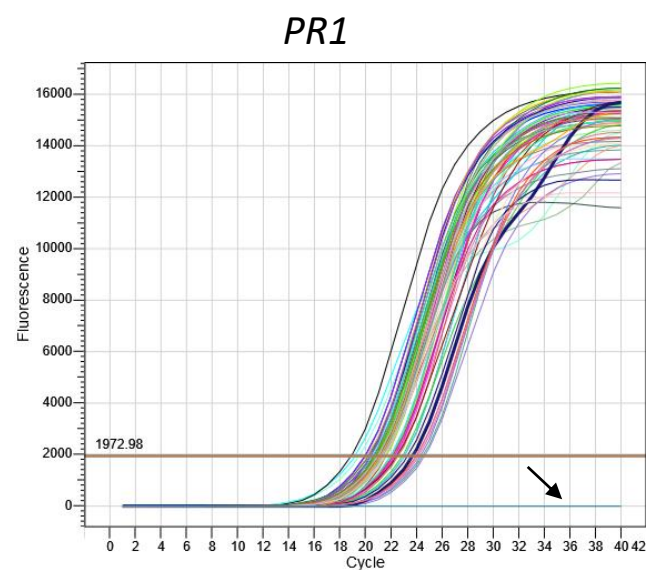

**Figure S1.** Real-time quantitative PCR amplification plots to access the expression of the tomato genes *WRKY41*, *WRKY40*, *RLK*, *PR1b*, *CBEF*, *CNGC*, *OPR3* and *PR1*, upon *Fusarium* spp. infection. Non-template control is indicated with a black arrow. Different colours of the amplification curves represent different samples.
